# Supplementary material
Source: ML conference proceedings conference paper supplement (https://openreview.net/forum?id=iqezE0EyXq)
Supplement: supplementary_material [file attachment]

# 420 Supplementary

## 421 A Training details

422 On Mazes, we trained models using per-pixel binary cross entropy with a training minibatch size of  
423 64 images (and inference batch size of 50 images) and a learning rate schedule starting with warmup  
424 followed by step learning rate decay as indicated in Schwarzschild et al. (2021) for 50 total epochs of  
425 training. On PathFinder, we used binary cross-entropy to train models with a minibatch size of 256  
426 images and a constant learning rate of  $1e-4$  for all models for a total of 20 epochs of training. All  
427 models were trained on NVIDIA RTX A6000 GPUs and implemented using PyTorch.(Paszke et al.,  
428 2017).

## 429 B Instability of other baseline ConvRNNs

430 ConvRNN training is often faced with instability issues that lead to sensitivity with respect to random  
431 seeds or lack of convergence of models on downstream tasks. We tested a suite of ConvRNNs  
432 previously introduced that are similar to LocRNN on three difficulty levels of PathFinder (in-difficulty  
433 evaluation, i.e., training and testing on each difficulty level independently). This evaluation high-  
434 lighted the above issue especially on the difficult levels of PathFinder where LocRNN was the  
435 only model which could converge to stable solutions across different random seeds unlike the other  
436 networks which performed at chance as shown below in Fig. 5.

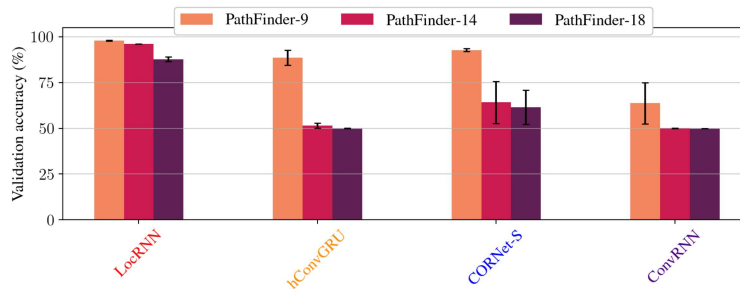

Figure 5: Performance of various ConvRNN models on PathFinder-9, PathFinder-14, and PathFinder-18.

## 437 C Input and output format for PathFinder and Mazes

438 Each example maze is an  $n \times n$  RGB matrix, with colored squares indicating the start (green) and  
439 end (red) positions in the maze. The output is a binary matrix of size  $n \times n$  with the segmented path  
440 indicating the maze solution. An example is shown in Figure 6 (top).

441 Each PathFinder example is an  $n \times n$  binary matrix as shown in Figure 6 (bottom). The output for  
442 one sample is a pair of probabilities denoting which class the sample belongs to (negative, meaning  
443 the disks are at the end of disconnected paths, or positive, meaning the disks are connected through  
444 the contour).

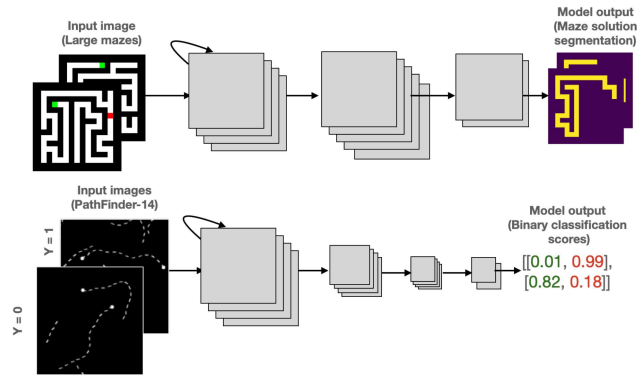

Figure 6: (Top) Example images from  $11 \times 11$  Mazes processed by a model to produce the solution as a segmentation prediction. (Bottom) Example input images from PathFinder-14 processed by a classifier to produce binary classification output.
